# Supplementary material for: Multilocus Family-Based Association Analysis of Seven Candidate Polymorphisms with Essential Hypertension in an African-Derived Semi-Isolated Brazilian Population
Source: Hindawi journal article supplement (doi:10.1155/2012/859219), 2012-01-01
Supplement: f1 [file 859219.f1.pdf]

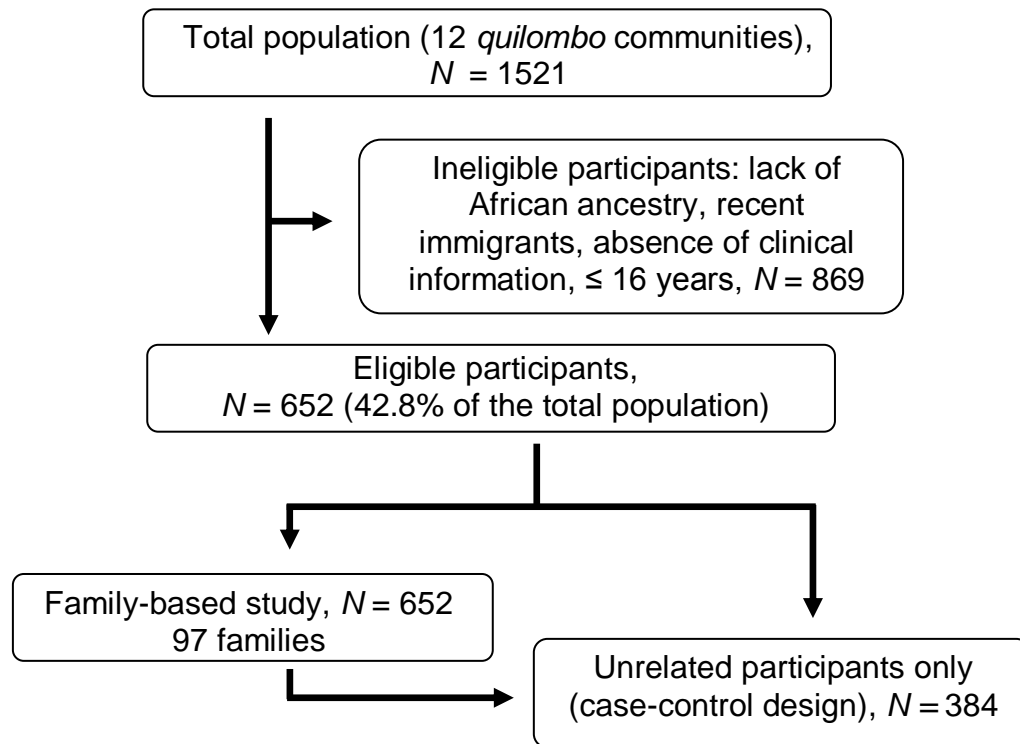

Figure S1. Flow diagram showing the key steps in the selection of participants.
