# Supplementary material for: Multilocus Family-Based Association Analysis of Seven Candidate Polymorphisms with Essential Hypertension in an African-Derived Semi-Isolated Brazilian Population
Source: Hindawi journal article supplement (doi:10.1155/2012/859219), 2012-01-01
Supplement: f2 [file 859219.f2.pdf]

Table S1: Information on the seven markers investigated and primers sequences.

| Gene        | SNP             | dbSNP     | Chr      | Alleles | Primers                                                       | ** Snupe Primer<br>/*Restriction site |
|-------------|-----------------|-----------|----------|---------|---------------------------------------------------------------|---------------------------------------|
| <i>ACE</i>  | I/D             | rs1799752 | 17q23    | I/D     | F - CTGGAGACCACTCCCATCCTTTCT<br>R - GATGTGGCCATCACATTCGTCAGAT |                                       |
| <i>ADD2</i> | c.-154+20128C>A | rs3755351 | 2p13     | A/C     | F – AGAGCAAATGCCTTTGTACCAT<br>R – CCATCATGCTATATGCCTTCCT      | **GGCTCCCAAGTCACTAGTCC                |
| <i>AGT</i>  | M235T           | rs669     | 1q42-q43 | C/T     | F – ACCTGAAGCAGCCGTTTGT<br>R - CAGGGTGCTGTCCACACTGGACCCC      | **GAAGACTGGCTGCTCCCTGA                |
| <i>GNB3</i> | C825T           | rs5443    | 12p13    | C/T     | F - CTTGCCCTGGAGCTGTCA<br>R - CTTCCAGCTGAGGAAGCAG             | **ATCATCTGCGGCATCACGTC                |
| <i>GNB3</i> | G-350A          | rs5441    | 12p13    | A/G     | F – CTGGACAGATGGGGAACACT<br>R – CTGACAAATCACAGGCTCCA          | *TaqI                                 |
| <i>NOS3</i> | Glu298Asp       | rs1799983 | 7q36     | G/T     | F – GAAGGCAGGAGACAGTGGAT<br>R – CAGCAGCATGTTGGACACTG          | **CTGCTGCAGGCCCCAGATGA                |
| <i>GRK4</i> | A486V           | rs1801058 | 4p16     | C/T     | F – ACTAAAAGCTGGCGAACCAC<br>R - TGGAAGGGCAGTACCTCATT          | **GGATATCGAGCAGTTCTCGG                |
